# Supplementary material
Source: publisher figshare collection journal article supplement (https://sage.figshare.com/ndownloader/files/16347470)
Supplement: Supplementary file 1 [file 16347470]

Supplementary material 2

MMAT appraisal scores for the reviewed papers

| Reviewed studies | | MMAT scores |
| --- | --- | --- |
| *Quantitative studies* | | |
| 1 | Brown et al. (2014), USA | **** |
| 2 | Brown et al. (2013), USA | **** |
| 3 | Engelhard et al. (2008), Netherlands | **** |
| 4 | Geraerts et al. (2007), Croatia | *** |
| 5 | Krinsley et al. (2003), USA | **** |
| 6 | McNally et al. (1995), USA | *** |
| 7 | McNally et al. (1994), USA | **** |
| 8 | Moradi et al. (2012), Iran | **** |
| 9 | Robinson and Jobson (2013), UK | *** |
| 10 | Rubin et al. (2004), USA | *** |
| 11 | Southwick et al. (1997), USA | *** |
| *Qualitative studies* | | |
| 12 | Burnell et al. (2009), UK | **** |
| 13 | Galmarini (2014), USA | *** |
| 14 | Lomsky‐Feder (2004), Israel | **** |
| 15 | Nets-Zehngut (2017), Israel | **** |
| 16 | Parr (2007), New Zealand | *** |
| 17 | Trott (2013), UK | **** |
| 18 | Walton (2010), USA | **** |
| 19 | Wiest (2013), USA | *** |
| 20 | Markwick (2008), Australia | *** |
| 21 | Briggs (2016), UK | *** |
| 22 | Ben-Ze'ev and Lomsky-Feder (2009), Israel | **** |
| 23 | Dwyer (2011), Australia | *** |
| 24 | Moore (2011), UK | *** |
| 25 | Nguyen (2013), Australia | *** |
| 26 | Bonnin (2016), Argentina | ** |
| 27 | Campos (2008), Portugal | *** |
| *Mixed-methods study* | | |
| 20 | (Coleman & Podolskij, 2007), Russia | **** |

Note. Scores vary from * (25 %)–one criterion met to **** (100 %)–all criteria met
